# Supplementary material
Source: Springer Nature journal article supplement (https://www.springermedizin.de/resource/supplementary/12947_2013_482_MOESM4_ESM.pdf/9555846)

# Global strain

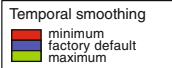

A

## Radial direction

$P_s=0.16, P_t=0.016, P_i=0.14$

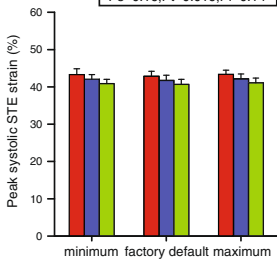

D

## Circumferential direction

$P_s=0.54, P_t=0.005, P_i=0.24$

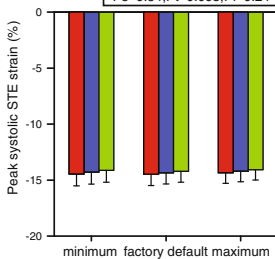

G

## Longitudinal direction

$P_s=0.80, P_t=0.14, P_i=0.36$

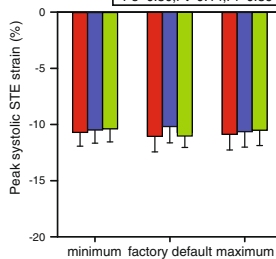

B

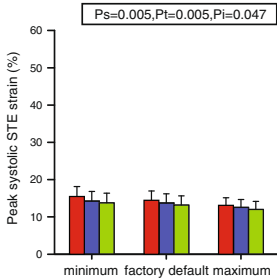

E

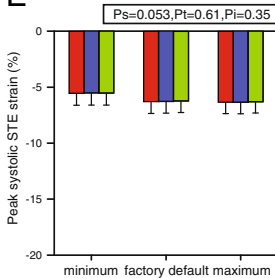

H

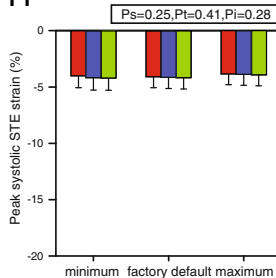

C

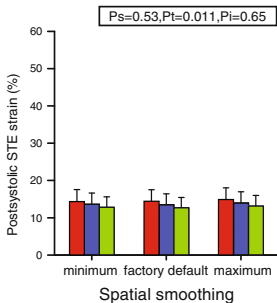

F

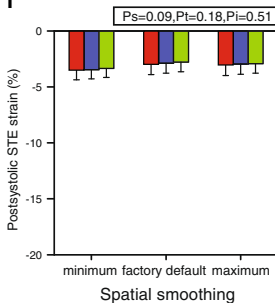

I

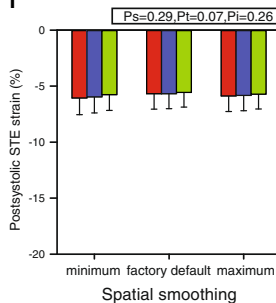

Supplement: MOESM4 [file 9555846]
